# Supplementary material for: Assessing the Predictability of Existing Water-to-enamel Geolocation Models Against Known Human Teeth: Do We Need Tissue-Specific δ 18O Reference Maps?
Source: Research Square preprint supplement (doi:10.21203/rs.3.rs-294531/v1), 2021-03-17
Supplement: Supplementary file 1 [file 777867d780f64351b75d41be.xlsx]

## Sheet: Sheet1
Title: Assessing the predictability of existing water-to-enamel geolocation models against known human teeth: Do we need tissue-specific δ 18O reference maps?
Supplementary Table S3. Water-to-enamel conversion equations.
study	conversion 1	conversion 2	original	Y	standard	slope	X	standard2	intercept
Coplen			yes	x	SMOW	1.03091	x	VPDB	30.91
Coplen			yes	x	VPDB	0.97001	x	VSMOW	-29.99
Bryant				p	SMOW	0.980392	c	SMOW	-8.13725
Bryant	Coplen			p	SMOW	1.0107	c	PDB	22.1667
Bryant			yes	c	SMOW	1.02	p	SMOW	8.3
Bryant	Coplen			c	PDB	0.989417	p	SMOW	-21.9321
Chenery cold			yes	p	SMOW	1.0322	c	SMOW	-9.6849
Chenery cold	Coplen			p	SMOW	1.06411	c	PDB	22.2204
Chenery cold				c	SMOW	0.968804	p	SMOW	9.38277
Chenery cold	Coplen			c	PDB	0.939757	p	SMOW	-20.8818
Chenery hot			yes	p	SMOW	1.122	c	SMOW	-13.73
Chenery hot	Coplen			p	SMOW	1.15668	c	PDB	20.951
Chenery hot				c	SMOW	0.891266	p	SMOW	12.2371
Chenery hot	Coplen			c	PDB	0.864543	p	SMOW	-18.113
Iacumin			yes	p	SMOW	0.98	c	SMOW	-8.5
Iacumin	Coplen			p	SMOW	1.01029	c	PDB	21.7918
Iacumin				c	SMOW	1.02041	p	SMOW	8.67347
Iacumin	Coplen			c	PDB	0.989813	p	SMOW	-21.5698
Wright	Coplen			p	SMOW	0.872039	c	SMOW	-5.56401
Wright			yes	p	SMOW	0.899	c	PDB	21.397
Wright	Coplen			c	SMOW	1.14674	p	SMOW	6.38046
Wright				c	PDB	1.11235	p	SMOW	-23.8009
Longinelli			yes	p	VSMOW	0.64	dw	VSMOW	22.37
Longinelli				dw	VSMOW	1.5625	p	VSMOW	-34.9531
Ehleringer_2010			yes	c	VSMOW	0.35	dw	VSMOW	27.6
Levinson	Chenery hot			c	VSMOW	0.409982	dw	VSMOW	29.5276
Chenery_2010	Chenery hot			c	VSMOW	0.409982	dw	VSMOW	30.7754
Levinson	Chenery cold			c	VSMOW	0.44565	dw	VSMOW	28.1776
Chenery_2010	Chenery cold			c	VSMOW	0.44565	dw	VSMOW	29.5339
Longinelli	Bryant	Coplen		c	VPDB	0.339506	dw	VSMOW	-3.21076
Longinelli	Iacumin	Coplen		c	VPDB	0.422658	dw	VSMOW	-1.34092
Longinelli	Wright	Coplen		c	VPDB	0.418182	dw	VSMOW	-0.130563
Longinelli	Chenery cold	Coplen		c	VPDB	0.440934	dw	VSMOW	-2.65049
Longinelli	Chenery hot	Coplen		c	VPDB	0.436912	dw	VSMOW	-1.33483
Longinelli	Bryant			dw	VSMOW	2.85714	c	VSMOW	-78.8571
Longinelli	Iacumin			dw	VSMOW	2.43913	c	VSMOW	-72.0217
Longinelli	Wright			dw	VSMOW	2.43913	c	VSMOW	-75.0652
Longinelli	Chenery cold			dw	VSMOW	2.24391	c	VSMOW	-63.228
Longinelli	Chenery hot			dw	VSMOW	2.24391	c	VSMOW	-66.2715
Longinelli	Bryant	Coplen		dw	VPDB	2.94546	c	VSMOW	9.45714
Longinelli	Iacumin	Coplen		dw	VPDB	2.36598	c	VSMOW	3.1726
Longinelli	Wright	Coplen		dw	VPDB	2.3913	c	VSMOW	0.312216
Longinelli	Chenery cold	Coplen		dw	VPDB	2.26791	c	VSMOW	6.01109
Longinelli	Chenery hot	Coplen		dw	VPDB	2.28879	c	VSMOW	3.05515
Luz			yes	p	VSMOW	0.78	dw	VSMOW	22.7
Luz				dw	VSMOW	1.28205	p	VSMOW	-29.1026
Levinson	Bryant			c	VSMOW	0.4692	dw	VSMOW	28.088
Chenery_2010	Bryant			c	VSMOW	0.4692	dw	VSMOW	29.516
Levinson	Iacumin			c	VSMOW	0.469388	dw	VSMOW	28.4694
Chenery_2010	Iacumin			c	VSMOW	0.469388	dw	VSMOW	29.898
Pollard_2011	Chenery hot			c	VSMOW	0.473262	dw	VSMOW	30.5258
Luz	Bryant	Coplen		c	VPDB	0.455132	dw	VSMOW	-2.73739
Luz	Iacumin	Coplen		c	VPDB	0.455132	dw	VSMOW	-1.3522
Luz	Wright	Coplen		c	VPDB	0.455314	dw	VSMOW	-2.36743
Luz	Chenery cold	Coplen		c	VPDB	0.455314	dw	VSMOW	-0.981697
Luz	Chenery hot	Coplen		c	VPDB	0.459072	dw	VSMOW	-0.372635
Luz	Bryant			dw	VSMOW	2.13129	c	VSMOW	-59.8636
Luz	Iacumin			dw	VSMOW	2.13129	c	VSMOW	-62.9071
Luz	Wright			dw	VSMOW	2.13043	c	VSMOW	-60.6522
Luz	Chenery cold			dw	VSMOW	2.13043	c	VSMOW	-63.6957
Luz	Chenery hot			dw	VSMOW	2.11299	c	VSMOW	-64.5009
Luz	Bryant	Coplen		dw	VPDB	2.19717	c	VSMOW	6.01449
Luz	Iacumin	Coplen		dw	VPDB	2.19717	c	VSMOW	2.97101
Luz	Wright	Coplen		dw	VPDB	2.19629	c	VSMOW	5.19957
Luz	Chenery cold	Coplen		dw	VPDB	2.19629	c	VSMOW	2.15609
Luz	Chenery hot	Coplen		dw	VPDB	2.17831	c	VSMOW	0.811714
Levinson			yes	p	VSMOW	0.46	dw	VSMOW	19.4
Levinson				dw	VSMOW	2.17391	p	VSMOW	-42.1739
Pollard_2011	Chenery cold			c	VSMOW	0.514435	dw	VSMOW	29.2626
Daux_4	Chenery hot			c	VSMOW	0.515182	dw	VSMOW	31.4276
Daux_5	Chenery hot			c	VSMOW	0.524274	dw	VSMOW	32.8306
Levinson	Wright			c	VSMOW	0.527499	dw	VSMOW	28.6272
Chenery_2010	Wright			c	VSMOW	0.527499	dw	VSMOW	30.2326
Levinson	Bryant	Coplen		c	VPDB	0.499011	dw	VSMOW	-1.59796
Levinson	Iacumin	Coplen		c	VPDB	0.499736	dw	VSMOW	0.502102
Levinson	Wright	Coplen		c	VPDB	0.508554	dw	VSMOW	1.86297
Levinson	Chenery cold	Coplen		c	VPDB	0.511683	dw	VSMOW	-2.21438
Levinson	Chenery hot	Coplen		c	VPDB	0.511683	dw	VSMOW	-0.657085
Levinson	Bryant			dw	VSMOW	1.94388	c	VSMOW	-56.8831
Levinson	Iacumin			dw	VSMOW	1.94106	c	VSMOW	-61.0029
Levinson	Wright			dw	VSMOW	1.9074	c	VSMOW	-62.621
Levinson	Chenery cold			dw	VSMOW	1.89574	c	VSMOW	-54.2696
Levinson	Chenery hot			dw	VSMOW	1.89574	c	VSMOW	-57.3131
Levinson	Bryant	Coplen		dw	VPDB	2.00396	c	VSMOW	3.20226
Levinson	Iacumin	Coplen		dw	VPDB	2.00106	c	VSMOW	-1.00474
Levinson	Wright	Coplen		dw	VPDB	1.96636	c	VSMOW	-3.66327
Levinson	Chenery cold	Coplen		dw	VPDB	1.95433	c	VSMOW	4.32764
Levinson	Chenery hot	Coplen		dw	VPDB	1.95433	c	VSMOW	1.28416
Daux_4				p	VSMOW	0.578035	dw	VSMOW	21.5318
Daux_4			yes	dw	VSMOW	1.73	p	VSMOW	-37.25
Pollard_2011	Bryant			c	VSMOW	0.54162	dw	VSMOW	29.2304
Pollard_2011	Iacumin			c	VSMOW	0.541837	dw	VSMOW	29.6122
Warner_2018	Chenery hot			c	VSMOW	0.543455	dw	VSMOW	29.2744
Daux_4	Chenery cold			c	VSMOW	0.560003	dw	VSMOW	30.2429
Daux_5	Chenery cold			c	VSMOW	0.569885	dw	VSMOW	31.7679
Daux_4	Bryant	Coplen		c	VPDB	0.52538	dw	VSMOW	-1.62924
Daux_4	Iacumin	Coplen		c	VPDB	0.525591	dw	VSMOW	-1.25884
Daux_4	Wright	Coplen		c	VPDB	0.52716	dw	VSMOW	-1.58658
Daux_4	Chenery cold	Coplen		c	VPDB	0.543212	dw	VSMOW	-0.647126
Daux_4	Chenery hot	Coplen		c	VPDB	0.552798	dw	VSMOW	0.832136
Daux_4	Bryant			dw	VSMOW	1.84631	c	VSMOW	-53.9685
Daux_4	Iacumin			dw	VSMOW	1.84557	c	VSMOW	-54.6516
Daux_4	Wright			dw	VSMOW	1.84008	c	VSMOW	-53.8672
Daux_4	Chenery cold			dw	VSMOW	1.78571	c	VSMOW	-54.0049
Daux_4	Chenery hot			dw	VSMOW	1.75474	c	VSMOW	-55.7443
Daux_4	Bryant	Coplen		dw	VPDB	1.90338	c	VSMOW	3.10107
Daux_4	Iacumin	Coplen		dw	VPDB	1.90262	c	VSMOW	2.3951
Daux_4	Wright	Coplen		dw	VPDB	1.89696	c	VSMOW	3.00967
Daux_4	Chenery cold	Coplen		dw	VPDB	1.8409	c	VSMOW	1.1913
Daux_4	Chenery hot	Coplen		dw	VPDB	1.80898	c	VSMOW	-1.50532
Daux_5				p	VSMOW	0.588235	dw	VSMOW	23.1059
Daux_5			yes	dw	VSMOW	1.7	p	VSMOW	-39.28
Longinelli	Chenery hot			c	VSMOW	0.57041	dw	VSMOW	32.1747
Daux_6	Chenery hot			c	VSMOW	0.578744	dw	VSMOW	31.7523
Daux_4	Bryant			c	VSMOW	0.589595	dw	VSMOW	30.2624
Daux_4	Iacumin			c	VSMOW	0.589831	dw	VSMOW	30.6447
Warner_2018	Chenery cold			c	VSMOW	0.590734	dw	VSMOW	27.9023
Daux_5	Bryant	Coplen		c	VPDB	0.553307	dw	VSMOW	1.22677
Daux_5	Iacumin	Coplen		c	VPDB	0.561391	dw	VSMOW	0.817065
Daux_5	Wright	Coplen		c	VPDB	0.571917	dw	VSMOW	-0.628156
Daux_5	Chenery cold	Coplen		c	VPDB	0.572146	dw	VSMOW	-0.257359
Daux_5	Chenery hot	Coplen		c	VPDB	0.573022	dw	VSMOW	-2.91752
Daux_5	Bryant			dw	VSMOW	1.75313	c	VSMOW	-56.4063
Daux_5	Iacumin			dw	VSMOW	1.72788	c	VSMOW	-54.8642
Daux_5	Wright			dw	VSMOW	1.69608	c	VSMOW	-51.3275
Daux_5	Chenery cold			dw	VSMOW	1.6954	c	VSMOW	-51.955
Daux_5	Chenery hot			dw	VSMOW	1.69281	c	VSMOW	-47.2332
Daux_5	Bryant	Coplen		dw	VPDB	1.80731	c	VSMOW	-2.21716
Daux_5	Iacumin	Coplen		dw	VPDB	1.78129	c	VSMOW	-1.45543
Daux_5	Wright	Coplen		dw	VPDB	1.7485	c	VSMOW	1.09833
Daux_5	Chenery cold	Coplen		dw	VPDB	1.7478	c	VSMOW	0.449814
Daux_5	Chenery hot	Coplen		dw	VPDB	1.74513	c	VSMOW	5.09146
Daux_6				p	VSMOW	0.649351	dw	VSMOW	21.8961
Daux_6			yes	dw	VSMOW	1.54	p	VSMOW	-33.72
Daux_5	Bryant			c	VSMOW	0.6	dw	VSMOW	31.868
Daux_5	Iacumin			c	VSMOW	0.60024	dw	VSMOW	32.2509
Pollard_2011	Wright			c	VSMOW	0.608918	dw	VSMOW	29.9115
Longinelli	Chenery cold			c	VSMOW	0.620035	dw	VSMOW	31.0549
Warner_2018	Bryant			c	VSMOW	0.621951	dw	VSMOW	27.7982
Daux_6	Bryant	Coplen		c	VPDB	0.58201	dw	VSMOW	0.929276
Daux_6	Iacumin	Coplen		c	VPDB	0.582243	dw	VSMOW	1.3007
Daux_6	Wright	Coplen		c	VPDB	0.59066	dw	VSMOW	-0.968544
Daux_6	Chenery cold	Coplen		c	VPDB	0.601444	dw	VSMOW	0.140586
Daux_6	Chenery hot	Coplen		c	VPDB	0.603303	dw	VSMOW	-3.01853
Daux_6	Bryant			dw	VSMOW	1.66667	c	VSMOW	-53.1133
Daux_6	Iacumin			dw	VSMOW	1.666	c	VSMOW	-53.73
Daux_6	Wright			dw	VSMOW	1.64226	c	VSMOW	-49.1224
Daux_6	Chenery cold			dw	VSMOW	1.61281	c	VSMOW	-50.0858
Daux_6	Chenery hot			dw	VSMOW	1.60784	c	VSMOW	-44.6951
Daux_6	Bryant	Coplen		dw	VPDB	1.71818	c	VSMOW	-1.59667
Daux_6	Iacumin	Coplen		dw	VPDB	1.7175	c	VSMOW	-2.23394
Daux_6	Wright	Coplen		dw	VPDB	1.69302	c	VSMOW	1.63976
Daux_6	Chenery cold	Coplen		dw	VPDB	1.66266	c	VSMOW	-0.233747
Daux_6	Chenery hot	Coplen		dw	VPDB	1.65754	c	VSMOW	5.00333
Chenery_2010			yes	p	VSMOW	0.46	dw	VSMOW	20.8
Chenery_2010				dw	VSMOW	2.17391	p	VSMOW	-45.2174
Warner_2018	Iacumin			c	VSMOW	0.6222	dw	VSMOW	28.1794
Daux_6	Chenery cold			c	VSMOW	0.629094	dw	VSMOW	30.5958
Longinelli	Bryant			c	VSMOW	0.6528	dw	VSMOW	-7.69235
Longinelli	Iacumin			c	VSMOW	0.653061	dw	VSMOW	31.5
Daux_6	Bryant			c	VSMOW	0.662338	dw	VSMOW	30.634
Chenery_2010	Bryant	Coplen		c	VPDB	0.603545	dw	VSMOW	-2.64869
Chenery_2010	Iacumin	Coplen		c	VPDB	0.610232	dw	VSMOW	-0.304761
Chenery_2010	Wright	Coplen		c	VPDB	0.633227	dw	VSMOW	-37.4449
Chenery_2010	Chenery cold	Coplen		c	VPDB	0.63348	dw	VSMOW	0.57231
Chenery_2010	Chenery hot	Coplen		c	VPDB	0.642479	dw	VSMOW	-0.267699
Chenery_2010	Bryant			dw	VSMOW	1.6072	c	VSMOW	-45.29
Chenery_2010	Iacumin			dw	VSMOW	1.58959	c	VSMOW	-48.6347
Chenery_2010	Wright			dw	VSMOW	1.53186	c	VSMOW	11.7836
Chenery_2010	Chenery cold			dw	VSMOW	1.53125	c	VSMOW	-48.2344
Chenery_2010	Chenery hot			dw	VSMOW	1.5098	c	VSMOW	-46.2514
Chenery_2010	Bryant	Coplen		dw	VPDB	1.65688	c	VSMOW	4.38855
Chenery_2010	Iacumin	Coplen		dw	VPDB	1.63872	c	VSMOW	0.499419
Chenery_2010	Wright	Coplen		dw	VPDB	1.57921	c	VSMOW	59.1335
Chenery_2010	Chenery cold	Coplen		dw	VPDB	1.57858	c	VSMOW	-0.903437
Chenery_2010	Chenery hot	Coplen		dw	VPDB	1.55647	c	VSMOW	0.416667
Pollard_2011			yes	p	VSMOW	0.531	dw	VSMOW	20.52
Pollard_2011				dw	VSMOW	1.88324	p	VSMOW	-38.6441
Daux_6	Iacumin			c	VSMOW	0.662603	dw	VSMOW	31.0164
Daux_4	Wright			c	VSMOW	0.662854	dw	VSMOW	31.0718
Daux_5	Wright			c	VSMOW	0.674552	dw	VSMOW	32.8768
Luz	Chenery hot			c	VSMOW	0.695187	dw	VSMOW	32.4688
Warner_2018	Wright			c	VSMOW	0.69923	dw	VSMOW	28.3013
Pollard_2011	Bryant	Coplen		c	VPDB	0.642736	dw	VSMOW	0.103241
Pollard_2011	Iacumin	Coplen		c	VPDB	0.64298	dw	VSMOW	0.156927
Pollard_2011	Wright	Coplen		c	VPDB	0.654326	dw	VSMOW	1.90787
Pollard_2011	Chenery cold	Coplen		c	VPDB	0.674343	dw	VSMOW	1.51207
Pollard_2011	Chenery hot	Coplen		c	VPDB	0.678265	dw	VSMOW	-2.53045
Pollard_2011	Bryant			dw	VSMOW	1.5092	c	VSMOW	-46.81
Pollard_2011	Iacumin			dw	VSMOW	1.50863	c	VSMOW	-46.8757
Pollard_2011	Wright			dw	VSMOW	1.48247	c	VSMOW	-48.7388
Pollard_2011	Chenery cold			dw	VSMOW	1.43846	c	VSMOW	-46.7051
Pollard_2011	Chenery hot			dw	VSMOW	1.43014	c	VSMOW	-40.475
Pollard_2011	Bryant	Coplen		dw	VPDB	1.55585	c	VSMOW	-0.160628
Pollard_2011	Iacumin	Coplen		dw	VPDB	1.55526	c	VSMOW	-0.244063
Pollard_2011	Wright	Coplen		dw	VPDB	1.52829	c	VSMOW	-2.91578
Pollard_2011	Chenery cold	Coplen		dw	VPDB	1.48292	c	VSMOW	-2.24228
Pollard_2011	Chenery hot	Coplen		dw	VPDB	1.47435	c	VSMOW	3.73077
Warner_2018				p	VSMOW	0.609756	dw	VSMOW	19.1159
Warner_2018			yes	dw	VSMOW	1.64	p	VSMOW	-31.35
Longinelli	Wright			c	VSMOW	0.733912	dw	VSMOW	32.033
Daux_6	Wright			c	VSMOW	0.744635	dw	VSMOW	31.4895
Luz	Chenery cold			c	VSMOW	0.755668	dw	VSMOW	31.3746
Luz	Bryant			c	VSMOW	0.7956	dw	VSMOW	31.454
Luz	Iacumin			c	VSMOW	0.795918	dw	VSMOW	31.8367
Warner_2018	Bryant	Coplen		c	VPDB	0.711907	dw	VSMOW	1.08931
Warner_2018	Iacumin	Coplen		c	VPDB	0.722308	dw	VSMOW	0.562172
Warner_2018	Wright	Coplen		c	VPDB	0.73301	dw	VSMOW	0.450705
Warner_2018	Chenery cold	Coplen		c	VPDB	0.771745	dw	VSMOW	0.527689
Warner_2018	Chenery hot	Coplen		c	VPDB	0.772054	dw	VSMOW	0.898948
Warner_2018	Bryant			dw	VSMOW	1.36256	c	VSMOW	-43.6469
Warner_2018	Iacumin			dw	VSMOW	1.34294	c	VSMOW	-42.2886
Warner_2018	Wright			dw	VSMOW	1.32333	c	VSMOW	-41.5191
Warner_2018	Chenery cold			dw	VSMOW	1.25691	c	VSMOW	-39.5349
Warner_2018	Chenery hot			dw	VSMOW	1.25641	c	VSMOW	-40
Warner_2018	Bryant	Coplen		dw	VSMOW	1.40468	c	VPDB	-1.53013
Warner_2018	Iacumin	Coplen		dw	VSMOW	1.38445	c	VPDB	-0.778299
Warner_2018	Wright	Coplen		dw	VSMOW	1.36424	c	VPDB	-0.614869
Warner_2018	Chenery cold	Coplen		dw	VSMOW	1.29576	c	VPDB	-0.683761
Warner_2018	Chenery hot	Coplen		dw	VSMOW	1.29525	c	VPDB	-1.16436
Luz	Wright			c	VSMOW	0.894455	dw	VSMOW	32.4114
Ehleringer_2010				dw	VSMOW	1.118	c	VSMOW	-36.2359
Ehleringer_2010		Coplen		c	VPDB	0.867637	dw	VSMOW	1.45639
Ehleringer_2010		Coplen		dw	VSMOW	1.15256	c	VPDB	-1.67857
Ehleringer_2010	Bryant			p	VSMOW	0.876917	dw	VSMOW	23.6386
Ehleringer_2010	Iacumin			p	VSMOW	0.876566	dw	VSMOW	23.2632
Ehleringer_2010	Wright			p	VSMOW	0.78	dw	VSMOW	22.7
Ehleringer_2010	Chenery cold			p	VSMOW	0.923257	dw	VSMOW	23.7702
Ehleringer_2010	Chenery hot			p	VSMOW	1.00358	dw	VSMOW	22.6356
Ehleringer_2010	Bryant			dw	VSMOW	1.14036	p	VSMOW	-26.9565
Ehleringer_2010	Iacumin			dw	VSMOW	1.14082	p	VSMOW	-26.539
Ehleringer_2010	Wright			dw	VSMOW	1.28205	p	VSMOW	-29.1026
Ehleringer_2010	Chenery cold			dw	VSMOW	1.08312	p	VSMOW	-25.746
Ehleringer_2010	Chenery hot			dw	VSMOW	0.996434	p	VSMOW	-22.5549
Dotsika				c	VSMOW	0.980392	dw	VSMOW	32.2951
Dotsika			yes	dw	VSMOW	1.02	c	VSMOW	-32.941
Dotsika		Coplen		c	VPDB	0.950997	dw	VSMOW	1.34357
Dotsika		Coplen		dw	VSMOW	1.05153	c	VPDB	-1.4128
Dotsika	Bryant			p	VSMOW	0.876917	dw	VSMOW	23.6386
Dotsika	Iacumin			p	VSMOW	0.876566	dw	VSMOW	23.2632
Dotsika	Wright			p	VSMOW	0.78	dw	VSMOW	22.7
Dotsika	Chenery cold			p	VSMOW	0.923257	dw	VSMOW	23.7702
Dotsika	Chenery hot			p	VSMOW	1.00358	dw	VSMOW	22.6356
Dotsika	Bryant			dw	VSMOW	1.14036	p	VSMOW	-26.9565
Dotsika	Iacumin			dw	VSMOW	1.14082	p	VSMOW	-26.539
Dotsika	Wright			dw	VSMOW	1.28205	p	VSMOW	-29.1026
Dotsika	Chenery cold			dw	VSMOW	1.08312	p	VSMOW	-25.746
Dotsika	Chenery hot			dw	VSMOW	0.996434	p	VSMOW	-22.5549
Ueda_1			yes	c	VPDB	0.0924523	dw	VSMOW	-7.59799
Ueda_2			yes	c	VPDB	0.110737	dw	VSMOW	-7.38759
Ueda_3			yes	c	VPDB	0.158607	dw	VSMOW	-6.92371
Ueda_4			yes	c	VPDB	0.147258	dw	VSMOW	-7.03771
Ueda_5			yes	c	VPDB	0.394176	dw	VSMOW	-4.22925
Ueda_6			yes	c	VPDB	0.377531	dw	VSMOW	-4.36143
Ueda_7			yes	c	VPDB	0.385242	dw	VSMOW	-4.24873
Ueda_8			yes	c	VPDB	0.421414	dw	VSMOW	-3.8722
Ueda_1				dw	VSMOW	10.8164	c	VPDB	82.1828
Ueda_2				dw	VSMOW	9.0304	c	VPDB	66.7129
Ueda_3				dw	VSMOW	6.30487	c	VPDB	43.6531
Ueda_4				dw	VSMOW	6.79079	c	VPDB	47.7916
Ueda_5				dw	VSMOW	2.53694	c	VPDB	10.7294
Ueda_6				dw	VSMOW	2.64879	c	VPDB	11.5525
Ueda_7				dw	VSMOW	2.59577	c	VPDB	11.0287
Ueda_8				dw	VSMOW	2.37296	c	VPDB	9.18859
Ueda_1	Coplen			c	VSMOW	0.09531	dw	VSMOW	23.0772
Ueda_2	Coplen			c	VSMOW	0.11416	dw	VSMOW	23.2941
Ueda_3	Coplen			c	VSMOW	0.16351	dw	VSMOW	23.7723
Ueda_4	Coplen			c	VSMOW	0.15181	dw	VSMOW	23.6547
Ueda_5	Coplen			c	VSMOW	0.40636	dw	VSMOW	26.55
Ueda_6	Coplen			c	VSMOW	0.3892	dw	VSMOW	26.4138
Ueda_7	Coplen			c	VSMOW	0.39715	dw	VSMOW	26.5299
Ueda_8	Coplen			c	VSMOW	0.43444	dw	VSMOW	26.9181
Ueda_1	Coplen			dw	VSMOW	10.4921	c	VSMOW	-242.127
Ueda_2	Coplen			dw	VSMOW	8.75964	c	VSMOW	-204.047
Ueda_3	Coplen			dw	VSMOW	6.11583	c	VSMOW	-145.387
Ueda_4	Coplen			dw	VSMOW	6.58718	c	VSMOW	-155.818
Ueda_5	Coplen			dw	VSMOW	2.46087	c	VSMOW	-65.3362
Ueda_6	Coplen			dw	VSMOW	2.56937	c	VSMOW	-67.8668
Ueda_7	Coplen			dw	VSMOW	2.51794	c	VSMOW	-66.8008
Ueda_8	Coplen			dw	VSMOW	2.30181	c	VSMOW	-61.9605
Ueda_1	Coplen	Bryant		p	VSMOW	0.0934412	dw	VSMOW	14.4874
Ueda_2	Coplen	Bryant		p	VSMOW	0.111922	dw	VSMOW	14.7001
Ueda_3	Coplen	Bryant		p	VSMOW	0.160304	dw	VSMOW	15.1689
Ueda_4	Coplen	Bryant		p	VSMOW	0.148833	dw	VSMOW	15.0537
Ueda_5	Coplen	Bryant		p	VSMOW	0.398392	dw	VSMOW	17.8922
Ueda_6	Coplen	Bryant		p	VSMOW	0.381569	dw	VSMOW	17.7586
Ueda_7	Coplen	Bryant		p	VSMOW	0.389363	dw	VSMOW	17.8725
Ueda_8	Coplen	Bryant		p	VSMOW	0.425922	dw	VSMOW	18.253
Ueda_1	Coplen	Bryant		dw	VSMOW	10.7019	p	VSMOW	-155.043
Ueda_2	Coplen	Bryant		dw	VSMOW	8.93483	p	VSMOW	-131.343
Ueda_3	Coplen	Bryant		dw	VSMOW	6.23815	p	VSMOW	-94.6259
Ueda_4	Coplen	Bryant		dw	VSMOW	6.71892	p	VSMOW	-101.145
Ueda_5	Coplen	Bryant		dw	VSMOW	2.51009	p	VSMOW	-44.911
Ueda_6	Coplen	Bryant		dw	VSMOW	2.62076	p	VSMOW	-46.541
Ueda_7	Coplen	Bryant		dw	VSMOW	2.5683	p	VSMOW	-45.9019
Ueda_8	Coplen	Bryant		dw	VSMOW	2.34785	p	VSMOW	-42.8554
Ueda_1	Coplen	Chenery cold		p	VSMOW	0.098379	dw	VSMOW	14.1353
Ueda_2	Coplen	Chenery cold		p	VSMOW	0.117836	dw	VSMOW	14.3592
Ueda_3	Coplen	Chenery cold		p	VSMOW	0.168775	dw	VSMOW	14.8528
Ueda_4	Coplen	Chenery cold		p	VSMOW	0.156698	dw	VSMOW	14.7315
Ueda_5	Coplen	Chenery cold		p	VSMOW	0.419445	dw	VSMOW	17.72
Ueda_6	Coplen	Chenery cold		p	VSMOW	0.401732	dw	VSMOW	17.5794
Ueda_7	Coplen	Chenery cold		p	VSMOW	0.409938	dw	VSMOW	17.6993
Ueda_8	Coplen	Chenery cold		p	VSMOW	0.448429	dw	VSMOW	18.1
Ueda_1	Coplen	Chenery cold		dw	VSMOW	10.1648	p	VSMOW	-143.683
Ueda_2	Coplen	Chenery cold		dw	VSMOW	8.48637	p	VSMOW	-121.858
Ueda_3	Coplen	Chenery cold		dw	VSMOW	5.92505	p	VSMOW	-88.0038
Ueda_4	Coplen	Chenery cold		dw	VSMOW	6.38169	p	VSMOW	-94.0121
Ueda_5	Coplen	Chenery cold		dw	VSMOW	2.3841	p	VSMOW	-42.2464
Ueda_6	Coplen	Chenery cold		dw	VSMOW	2.48922	p	VSMOW	-43.759
Ueda_7	Coplen	Chenery cold		dw	VSMOW	2.43939	p	VSMOW	-43.1755
Ueda_8	Coplen	Chenery cold		dw	VSMOW	2.23001	p	VSMOW	-40.3631
Ueda_1	Coplen	Chenery hot		p	VSMOW	0.106938	dw	VSMOW	12.1626
Ueda_2	Coplen	Chenery hot		p	VSMOW	0.128088	dw	VSMOW	12.4059
Ueda_3	Coplen	Chenery hot		p	VSMOW	0.183458	dw	VSMOW	12.9425
Ueda_4	Coplen	Chenery hot		p	VSMOW	0.170331	dw	VSMOW	12.8106
Ueda_5	Coplen	Chenery hot		p	VSMOW	0.455936	dw	VSMOW	16.0591
Ueda_6	Coplen	Chenery hot		p	VSMOW	0.436682	dw	VSMOW	15.9062
Ueda_7	Coplen	Chenery hot		p	VSMOW	0.445602	dw	VSMOW	16.0366
Ueda_8	Coplen	Chenery hot		p	VSMOW	0.487442	dw	VSMOW	16.4721
Ueda_1	Coplen	Chenery hot		dw	VSMOW	9.35123	p	VSMOW	-113.735
Ueda_2	Coplen	Chenery hot		dw	VSMOW	7.80716	p	VSMOW	-96.8551
Ueda_3	Coplen	Chenery hot		dw	VSMOW	5.45083	p	VSMOW	-70.5474
Ueda_4	Coplen	Chenery hot		dw	VSMOW	5.87093	p	VSMOW	-75.2103
Ueda_5	Coplen	Chenery hot		dw	VSMOW	2.19329	p	VSMOW	-35.2223
Ueda_6	Coplen	Chenery hot		dw	VSMOW	2.28999	p	VSMOW	-36.4252
Ueda_7	Coplen	Chenery hot		dw	VSMOW	2.24415	p	VSMOW	-35.9886
Ueda_8	Coplen	Chenery hot		dw	VSMOW	2.05153	p	VSMOW	-33.793
Ueda_1	Coplen	Iacumin		p	VSMOW	0.0934038	dw	VSMOW	14.1156
Ueda_2	Coplen	Iacumin		p	VSMOW	0.111877	dw	VSMOW	14.3282
Ueda_3	Coplen	Iacumin		p	VSMOW	0.16024	dw	VSMOW	14.7968
Ueda_4	Coplen	Iacumin		p	VSMOW	0.148774	dw	VSMOW	14.6817
Ueda_5	Coplen	Iacumin		p	VSMOW	0.398233	dw	VSMOW	17.519
Ueda_6	Coplen	Iacumin		p	VSMOW	0.381416	dw	VSMOW	17.3855
Ueda_7	Coplen	Iacumin		p	VSMOW	0.389207	dw	VSMOW	17.4993
Ueda_8	Coplen	Iacumin		p	VSMOW	0.425751	dw	VSMOW	17.8797
Ueda_1	Coplen	Iacumin		dw	VSMOW	10.7062	p	VSMOW	-151.125
Ueda_2	Coplen	Iacumin		dw	VSMOW	8.9384	p	VSMOW	-128.071
Ueda_3	Coplen	Iacumin		dw	VSMOW	6.24065	p	VSMOW	-92.3418
Ueda_4	Coplen	Iacumin		dw	VSMOW	6.72161	p	VSMOW	-98.6844
Ueda_5	Coplen	Iacumin		dw	VSMOW	2.51109	p	VSMOW	-43.9919
Ueda_6	Coplen	Iacumin		dw	VSMOW	2.62181	p	VSMOW	-45.5814
Ueda_7	Coplen	Iacumin		dw	VSMOW	2.56933	p	VSMOW	-44.9615
Ueda_8	Coplen	Iacumin		dw	VSMOW	2.34879	p	VSMOW	-41.9958
Ueda_1	Coplen	Wright		p	VSMOW	0.083114	dw	VSMOW	14.5602
Ueda_2	Coplen	Wright		p	VSMOW	0.099552	dw	VSMOW	14.7493
Ueda_3	Coplen	Wright		p	VSMOW	0.142587	dw	VSMOW	15.1663
Ueda_4	Coplen	Wright		p	VSMOW	0.132384	dw	VSMOW	15.0639
Ueda_5	Coplen	Wright		p	VSMOW	0.354362	dw	VSMOW	17.5886
Ueda_6	Coplen	Wright		p	VSMOW	0.339398	dw	VSMOW	17.4698
Ueda_7	Coplen	Wright		p	VSMOW	0.34633	dw	VSMOW	17.5711
Ueda_8	Coplen	Wright		p	VSMOW	0.378849	dw	VSMOW	17.9096
Ueda_1	Coplen	Wright		dw	VSMOW	12.0317	p	VSMOW	-175.183
Ueda_2	Coplen	Wright		dw	VSMOW	10.045	p	VSMOW	-148.157
Ueda_3	Coplen	Wright		dw	VSMOW	7.01326	p	VSMOW	-106.365
Ueda_4	Coplen	Wright		dw	VSMOW	7.55377	p	VSMOW	-113.789
Ueda_5	Coplen	Wright		dw	VSMOW	2.82197	p	VSMOW	-49.6347
Ueda_6	Coplen	Wright		dw	VSMOW	2.9464	p	VSMOW	-51.473
Ueda_7	Coplen	Wright		dw	VSMOW	2.88742	p	VSMOW	-50.7352
Ueda_8	Coplen	Wright		dw	VSMOW	2.63958	p	VSMOW	-47.2738
Hermann			yes	p	VSMOW	0.62	dw	VSMOW	21.74
Hermann				dw	VSMOW	1.6129	p	VSMOW	-35.0645
Hermann	Bryant			c	VSMOW	0.6324	dw	VSMOW	30.4748
Hermann	Bryant			dw	VSMOW	1.58128	c	VSMOW	-48.1891
Hermann	Iacumin			c	VSMOW	0.632653	dw	VSMOW	30.8571
Hermann	Iacumin			dw	VSMOW	1.58065	c	VSMOW	-48.7742
Hermann	Wright			c	VSMOW	0.710977	dw	VSMOW	31.3105
Hermann	Wright			dw	VSMOW	1.40651	c	VSMOW	-44.0387
Hermann	Chenery cold			c	VSMOW	0.600659	dw	VSMOW	30.4446
Hermann	Chenery cold			dw	VSMOW	1.66484	c	VSMOW	-50.6853
Hermann	Chenery hot			c	VSMOW	0.552585	dw	VSMOW	31.6132
Hermann	Chenery hot			dw	VSMOW	1.80968	c	VSMOW	-57.2097
Hermann	Bryant	Coplen		c	VPDB	0.613439	dw	VSMOW	-0.422151
Hermann	Bryant	Coplen		dw	VSMOW	1.63015	c	VPDB	0.688172
Hermann	Iacumin	Coplen		c	VPDB	0.613684	dw	VSMOW	-0.0512723
Hermann	Iacumin	Coplen		dw	VSMOW	1.6295	c	VPDB	0.0835484
Hermann	Wright	Coplen		c	VPDB	0.68966	dw	VSMOW	0.388529
Hermann	Wright	Coplen		dw	VSMOW	1.44999	c	VPDB	-0.563363
Hermann	Chenery cold	Coplen		c	VPDB	0.582649	dw	VSMOW	-0.451461
Hermann	Chenery cold	Coplen		dw	VSMOW	1.7163	c	VPDB	0.774842
Hermann	Chenery hot	Coplen		c	VPDB	0.536016	dw	VSMOW	0.682107
Hermann	Chenery hot	Coplen		dw	VSMOW	1.86561	c	VPDB	-1.27255
Posey			yes	c	VSMOW	0.77	dw	VSMOW	28.1
Posey				dw	VSMOW	1.2987	c	VSMOW	-36.4935
Posey	Coplen			c	VPDB	0.746913	dw	VSMOW	-2.72575
Posey	Coplen			dw	VSMOW	1.33884	c	VPDB	3.64935
Posey	Bryant			p	VSMOW	0.754902	dw	VSMOW	19.4118
Posey	Bryant			dw	VSMOW	1.32468	p	VSMOW	-25.7143
Posey	Iacumin			p	VSMOW	0.7546	dw	VSMOW	19.038
Posey	Iacumin			dw	VSMOW	1.32521	p	VSMOW	-25.2293
Posey	Wright			p	VSMOW	0.67147	dw	VSMOW	18.9403
Posey	Wright			dw	VSMOW	1.48927	p	VSMOW	-28.2072
Posey	Chenery cold			p	VSMOW	0.794794	dw	VSMOW	19.3199
Posey	Chenery cold			dw	VSMOW	1.25819	p	VSMOW	-24.3081
Posey	Chenery hot			p	VSMOW	0.86394	dw	VSMOW	17.7982
Posey	Chenery hot			dw	VSMOW	1.15749	p	VSMOW	-20.6012
Keller			yes	c	VSMOW	0.396	dw	VSMOW	26.9
Keller				dw	VSMOW	2.52525	c	VSMOW	-67.9293
Keller	Coplen			c	VPDB	0.384127	dw	VSMOW	-3.88977
Keller	Coplen			dw	VSMOW	2.60331	c	VPDB	10.1263
Keller	Bryant			p	VSMOW	0.388235	dw	VSMOW	18.2353
Keller	Bryant			dw	VSMOW	2.57576	p	VSMOW	-46.9697
Keller	Iacumin			p	VSMOW	0.38808	dw	VSMOW	17.862
Keller	Iacumin			dw	VSMOW	2.57679	p	VSMOW	-46.0266
Keller	Wright			p	VSMOW	0.345327	dw	VSMOW	17.8938
Keller	Wright			dw	VSMOW	2.8958	p	VSMOW	-51.817
Keller	Chenery cold			p	VSMOW	0.408751	dw	VSMOW	18.0813
Keller	Chenery cold			dw	VSMOW	2.44648	p	VSMOW	-44.2354
Keller	Chenery hot			p	VSMOW	0.444312	dw	VSMOW	16.4518
Keller	Chenery hot			dw	VSMOW	2.25067	p	VSMOW	-37.0276
